# Supplementary material for: HCV poly U/UC sequence–induced inflammation leads to metabolic disorders in vulvar lichen sclerosis
Source: Life Sci Alliance. 2021 Jun 18;4(8):e202000906. doi: 10.26508/lsa.202000906 (PMC8321666; doi:10.26508/lsa.202000906)
Supplement: Supplementary file 4 [file LSA-2020-00906_TableS4.xlsx]

## Sheet: Dataset_EV4
Table S4. Metabolomic data of paired Vulvar Lichen Sclerosis samples.
	Tissue_47C	Tissue_49C	Tissue_50C	Tissue_47	Tissue_49	Tissue_50
Label	Control	Control	Control	VLS	VLS	VLS
Urea	17156.3	34595.4	59826.7	10872.1	17880.5	10497.2
ethanolamine	14152.7	5628.01	N/A	13171.4	11963.3	13844
glycine	N/A	N/A	N/A	N/A	N/A	N/A
alanine	377717	380539	498540	197983	343486	276129
betaine aldehyde	58490.8	94809.9	77835.1	33746	93404.4	67948.9
choline	5.62112e+06	1.03056e+07	2.82146e+06	4.02043e+06	4.82333e+06	1.73762e+07
4-aminobutyrate	4297.62	N/A	N/A	N/A	N/A	N/A
dimethylglycine	741725	1.42897e+06	1.03022e+06	380080	1.12771e+06	1.77091e+06
serine	579274	803116	1.32683e+06	93389.2	590528	173264
cytosine	14814.5	14512.9	7570.1	8417.26	49789.8	24751.2
Creatinine	16291.7	71696	71566.7	25279.2	40949.4	61555.7
proline	652618	626483	1.01747e+06	662018	826070	475991
indole	19573.5	14070.9	32226.2	8472.84	38129.2	12359.2
betaine	5.15742e+06	1.6666e+07	6.04454e+06	5.34407e+06	2.28314e+07	1.14171e+06
valine	15828.7	N/A	20799.3	7204.4	18685.2	6736.83
threonine	205930	212870	531756	90256.5	336708	116643
homoserine	N/A	N/A	N/A	N/A	N/A	N/A
purine	12268.9	13020.1	26227.1	20344.5	26080.2	14537.5
cysteine	N/A	N/A	N/A	N/A	N/A	N/A
creatine	3.70456e+06	9.77964e+06	8.28885e+06	2.80063e+06	7.9487e+06	5.92436e+06
nicotinamide	90336.9	164479	326731	31132.9	477719	486621
Imidazoleacetic acid	N/A	N/A	N/A	N/A	N/A	N/A
thymine	N/A	40800.7	13831.1	N/A	18430.3	53025.4
DL-Pipecolic acid	237042	502379	378656	163994	1.0347e+06	488693
N-Acetylputrescine	25833.3	28036.1	N/A	13697.5	19926.6	19170.9
hydroxyproline	10597.1	15904.2	20337.3	12792	27508.4	13570.3
leucine-isoleucine	530435	666353	1.5804e+06	380988	1.4777e+06	803930
ornithine	195875	87417.2	243377	148805	63202	75398.5
asparagine	55616.9	120666	172421	32307.5	180330	41939
aspartate	184695	416293	296545	87371.9	294045	69892.6
adenine	358926	724829	649872	58536	154394	151339
Methylcysteine	47651.7	82828.2	216981	37441.3	121263	55584.5
homocysteine	N/A	N/A	N/A	N/A	N/A	N/A
methylnicotinamide	N/A	N/A	N/A	N/A	N/A	N/A
histidinol	10393.1	N/A	N/A	35253.3	N/A	N/A
lysine	48353.8	60449	93069.2	42361.8	63320.7	79642.7
glutamine	1.59277e+06	1.8433e+06	2.29603e+06	747922	2.29658e+06	1.74838e+06
O-acetyl-L-serine	N/A	N/A	N/A	N/A	N/A	N/A
glutamate	1.26276e+06	2.94166e+06	1.96234e+06	1.17858e+06	2.84232e+06	2.11527e+06
methionine	18867.9	57989.5	104174	30855.7	140362	48406.9
guanine	39274.8	72889.3	63254.2	16275.6	91852.9	55992.5
histidine	673568	1.8121e+06	3.03992e+06	78152.4	2.20347e+06	214533
2-Aminooctanoic acid	29063.8	50370	73213.7	27366.8	74266	69057.1
carnitine	2.28965e+06	6.30362e+06	5.20106e+06	2.55032e+06	6.79679e+06	4.87544e+06
Methionine sulfoxide	6418.1	10881.9	6909.79	3810.48	11117.2	N/A
phenylalanine	171460	230913	231080	123858	251102	113511
Pyridoxamine	N/A	N/A	N/A	N/A	N/A	N/A
pyridoxine	N/A	N/A	N/A	N/A	N/A	N/A
1-Methyl-Histidine	20148.3	N/A	60652.5	N/A	38974.7	39747.4
N-acetyl-L-ornithine	23727.9	36930.8	74725.4	20846.8	74537.1	17733.1
arginine	930601	2.77981e+06	3.77807e+06	385660	3.18117e+06	1.27772e+06
citrulline	2.68665e+06	3.93897e+06	6.4093e+06	141972	4.67948e+06	465966
N-carbamoyl-L-aspartate	N/A	N/A	N/A	N/A	N/A	N/A
glucosamine	4452.89	7256.64	7941.22	N/A	N/A	N/A
tyrosine	35101.9	65843.7	87594.2	40229.8	103319	46799.8
Phosphorylcholine	220076	705614	663243	126582	871154	638756
3-phospho-serine	N/A	N/A	N/A	N/A	N/A	N/A
N6-Acetyl-L-lysine	N/A	N/A	N/A	N/A	N/A	N/A
Acetyllysine	N/A	N/A	N/A	N/A	N/A	N/A
N-acetyl-glutamine	N/A	N/A	N/A	N/A	N/A	N/A
N-acetyl-glutamate	24214.4	38525.7	49667.6	21300.7	73063.2	24375.3
Ng,NG-dimethyl-L-arginine	117089	246214	544783	143193	392467	241190
Acetylcarnitine DL	3.22968e+06	4.53638e+06	4.42437e+06	1.66821e+06	7.13336e+06	7.69409e+06
tryptophan	96763.6	121231	128846	65472.9	135644	62041.4
Kynurenine	N/A	N/A	N/A	N/A	N/A	N/A
N-acetyl-glucosamine	N/A	N/A	N/A	N/A	N/A	N/A
Flavone	N/A	N/A	N/A	N/A	N/A	N/A
cystathionine	N/A	N/A	N/A	N/A	N/A	N/A
5-methoxytryptophan	N/A	N/A	N/A	N/A	N/A	N/A
Cystine	N/A	N/A	N/A	8632.96	N/A	N/A
cytidine	30415.6	62205.9	133819	18337.9	108304	88119.5
biotin	N/A	N/A	N/A	N/A	13213.6	12493.9
deoxyadenosine	N/A	7212.44	N/A	N/A	N/A	9607.83
Glycerophosphocholine	4.42464e+06	4.17006e+06	5.16533e+06	1.33893e+06	3.89519e+06	2.51781e+06
acadesine	N/A	N/A	N/A	N/A	N/A	N/A
D-glucosamine-6-phosphate	N/A	N/A	N/A	N/A	N/A	N/A
D-glucosamine-1-phosphate	N/A	N/A	N/A	N/A	N/A	N/A
thiamine	N/A	N/A	N/A	N/A	N/A	N/A
S-ribosyl-L-homocysteine-posi	N/A	N/A	N/A	N/A	N/A	N/A
deoxyguanosine	N/A	N/A	N/A	N/A	N/A	N/A
adenosine	2.61684e+06	1.08141e+07	9.31169e+06	753889	2.07176e+06	2.27241e+06
1-Methyladenosine	67264.1	103544	273831	104665	95632.6	88415.4
guanosine	40411	78841.4	44489.9	N/A	59143.7	40195.2
L-arginino-succinate	6278.95	N/A	7151.72	6418.1	8014.8	13780.7
S-methyl-5-thioadenosine	N/A	27169.6	28809.8	11037.1	55405.9	32431.2
7-methylguanosine	6399.63	10314.6	12630.3	N/A	18061	14381.5
dCMP	N/A	N/A	N/A	N/A	N/A	N/A
glutathione	8416.51	133628	38939	6946.97	276621	47321.3
dTMP	N/A	N/A	N/A	N/A	N/A	N/A
CMP	100504	180435	242009	83856.4	130325	147890
UMP	17933	28697	27817.4	14963.8	28038.6	25510.2
dAMP	N/A	N/A	N/A	N/A	N/A	N/A
Nicotinamide ribotide	N/A	17147.5	18686	N/A	15728.3	7947.6
aminoimidazole carboxamide ribonucleotide	N/A	39447.6	26341.3	18925.1	81666.8	30484.3
thiamine-phosphate	N/A	N/A	N/A	N/A	N/A	N/A
dGMP	N/A	N/A	N/A	N/A	N/A	N/A
AMP	416121	743739	1.23033e+06	1.2024e+06	524903	736276
IMP	17797.9	40435.7	111110	100945	9938.64	113176
S-adenosyl-L-methioninamine	N/A	N/A	N/A	N/A	N/A	N/A
GMP	41118.3	56146.6	128597	61766.7	60496.6	80658.5
xanthosine-5-phosphate	N/A	N/A	N/A	N/A	N/A	N/A
riboflavin	N/A	N/A	N/A	N/A	4008.6	N/A
S-adenosyl-L-homoCysteine-posi	16594.3	65978	50729.5	22532.6	53996	72874.9
S-adenosyl-L-methionine	10912.3	43037.2	37086.9	8025.81	67558.7	21021.2
folate	N/A	N/A	N/A	N/A	N/A	3203.83
7,8-dihydrofolate	N/A	N/A	N/A	N/A	N/A	N/A
5-methyl-THF	N/A	N/A	N/A	N/A	N/A	N/A
Diiodothyronine	N/A	N/A	N/A	N/A	N/A	N/A
glutathione disulfide-posi	34778.1	385673	279438	11166.7	193571	187820
NAD+_posi	279619	643479	812924	361751	337059	593428
NADH	78989.5	222792	138660	20565.6	65226.5	143527
dephospho-CoA-posi	N/A	N/A	N/A	N/A	N/A	N/A
NADP+_posi	N/A	N/A	N/A	N/A	N/A	N/A
NADPH	N/A	N/A	N/A	N/A	N/A	N/A
coenzyme A-posi	N/A	N/A	N/A	N/A	N/A	N/A
FAD	N/A	21421.8	N/A	N/A	16798.3	10248.3
acetyl-CoA-posi	N/A	N/A	N/A	N/A	N/A	N/A
propionyl-CoA-posi	N/A	N/A	N/A	N/A	N/A	N/A
acetoacetyl-CoA-posi	N/A	N/A	N/A	N/A	N/A	N/A
malonyl-CoA-posi	N/A	N/A	N/A	N/A	N/A	N/A
succinyl-CoA-posi	N/A	N/A	N/A	N/A	N/A	N/A
sarcosine	374761	433259	633528	169838	451840	264853
putrescine	231767	173821	152389	88048.3	161162	204751
spermidine	133703	130723	129445	199639	105221	83893.5
spermine	N/A	N/A	N/A	N/A	N/A	N/A
N-acetyl spermine	N/A	N/A	N/A	N/A	N/A	N/A
N-acetyl spermidine	N/A	N/A	N/A	N/A	N/A	N/A
Nicotinamide Riboside	N/A	N/A	N/A	N/A	N/A	N/A
Adenylosuccinate	N/A	N/A	N/A	N/A	N/A	N/A
cholesterol	N/A	11112.1	31548.2	43148.8	N/A	14541.3
arginosuccinic acid	9356.16	3585.47	8025.24	6801.9	9505.06	24722.8
phosphocreatine	3203.83	4306.12	N/A	N/A	N/A	12945.4
retinoic acid	N/A	7874.55	N/A	N/A	N/A	N/A
N-acetyl-L-alanine	7.81872e+06	1.25052e+07	1.00007e+07	3.4189e+06	5.02018e+06	5.20638e+06
HMG-CoA_pos	N/A	N/A	N/A	N/A	N/A	N/A
cysteine sulfinate	N/A	N/A	N/A	N/A	N/A	N/A
glyoxylate	N/A	N/A	N/A	N/A	N/A	N/A
glycolate	N/A	N/A	N/A	N/A	N/A	N/A
pyruvate	N/A	N/A	N/A	N/A	N/A	N/A
lactate	N/A	15749	14756.2	N/A	12955	12561.2
2-oxobutanoate	N/A	N/A	N/A	N/A	N/A	N/A
acetoacetate	N/A	N/A	N/A	N/A	N/A	N/A
glycerate	N/A	N/A	N/A	N/A	N/A	N/A
uracil	N/A	N/A	N/A	N/A	N/A	N/A
fumarate	N/A	N/A	N/A	N/A	N/A	N/A
Maleic acid	N/A	N/A	N/A	N/A	N/A	N/A
2-keto-isovalerate	N/A	N/A	N/A	N/A	N/A	N/A
Guanidoacetic acid	N/A	N/A	N/A	N/A	N/A	N/A
succinate	N/A	N/A	N/A	5318.47	8017.21	N/A
Methylmalonic acid	N/A	N/A	N/A	N/A	8001.89	4143.21
3-S-methylthiopropionate	N/A	N/A	N/A	N/A	N/A	N/A
nicotinate	N/A	N/A	N/A	N/A	N/A	N/A
taurine	268426	327033	495358	76861.7	402273	338999
Pyroglutamic acid	N/A	N/A	N/A	N/A	6192.03	N/A
Citraconic acid	N/A	N/A	N/A	N/A	N/A	N/A
2-ketohaxanoic acid	N/A	N/A	N/A	N/A	N/A	N/A
N-Acetyl-L-alanine1	24770.6	49490	68103.1	8577.22	47227.2	35168.3
oxaloacetate	N/A	N/A	N/A	N/A	N/A	N/A
Hydroxyisocaproic acid	4810.97	4615.26	5228.57	N/A	5075.28	N/A
malate	24190	42136.1	32254.7	N/A	63136.5	N/A
hypoxanthine	22893.3	42609.6	29163.9	N/A	46433.4	56994.1
anthranilate	5119.84	12474.3	N/A	N/A	14749.3	16758.7
p-aminobenzoate	5565.39	16634.4	N/A	4256.29	9702.97	18678.6
p-hydroxybenzoate	64464.6	121790	236390	13029.8	39881.2	N/A
acetylphosphate	N/A	N/A	N/A	N/A	N/A	N/A
Carbamoyl phosphate	23357.7	33763.4	75043	4922.88	44730.1	40933.9
a-ketoglutarate	14850	58755.9	16778.3	28045.2	14189.4	48575.7
Phenylpropiolic acid	N/A	7737.46	5517.99	3403.04	20911.2	10768.2
2-oxo-4-methylthiobutanoate	N/A	N/A	N/A	N/A	N/A	N/A
2-Hydroxy-2-methylbutanedioic acid	N/A	N/A	N/A	N/A	4723.47	N/A
3-methylphenylacetic acid	N/A	N/A	N/A	N/A	N/A	N/A
xanthine	9535.6	N/A	39684.3	12252.3	23382.6	42185.7
Hydroxyphenylacetic acid	N/A	19754.7	N/A	N/A	N/A	22544.5
2,3-dihydroxybenzoic acid	N/A	N/A	N/A	N/A	N/A	N/A
orotate	N/A	N/A	6666.02	N/A	N/A	N/A
dihydroorotate	N/A	N/A	N/A	N/A	N/A	N/A
allantoin	N/A	N/A	N/A	N/A	N/A	N/A
Aminoadipic acid	6212.49	N/A	6573.92	3203.83	N/A	3348.72
Indole-3-carboxylic acid	N/A	2887.45	10434.7	N/A	N/A	N/A
phenylpyruvate	N/A	N/A	N/A	N/A	N/A	N/A
Atrolactic acid	N/A	N/A	N/A	N/A	N/A	N/A
Phenyllactic acid	N/A	N/A	N/A	N/A	N/A	N/A
quinolinate	N/A	N/A	N/A	N/A	N/A	N/A
phosphoenolpyruvate	N/A	N/A	N/A	N/A	N/A	N/A
Uric acid	15701.5	43325.7	93087.3	29649	112148	25708.2
dihydroxy-acetone-phosphate	N/A	N/A	N/A	N/A	N/A	N/A
D-glyceraldehdye-3-phosphate	N/A	N/A	N/A	N/A	N/A	N/A
sn-glycerol-3-phosphate	5516.15	15130.6	N/A	N/A	7908.38	3810.49
shikimate	14292.8	5240.64	42679.9	149750	26797.5	13506.4
aconitate	N/A	N/A	3998.16	N/A	N/A	N/A
allantoate	30904.1	17521.9	35862.5	N/A	14856.1	3203.83
Ascorbic acid	N/A	N/A	N/A	N/A	N/A	N/A
2-Isopropylmalic acid	N/A	N/A	N/A	N/A	N/A	N/A
N-carbamoyl-L-aspartate-nega	15297.5	25457.9	39496.7	N/A	8641.49	N/A
Pyrophosphate	23742.1	15015.9	12040.1	7842.41	23183.9	11745
glucono-?-lactone	N/A	N/A	N/A	N/A	N/A	N/A
myo-inositol	N/A	83956.6	81505.2	N/A	38726.7	89722.4
hydroxyphenylpyruvate	N/A	N/A	N/A	N/A	N/A	N/A
homocysteic acid	N/A	N/A	N/A	N/A	N/A	N/A
4-Pyridoxic acid	4810.97	13449.7	58267.7	N/A	14255.3	52888.1
3-phosphoglycerate	N/A	8197.29	N/A	4093.67	N/A	10511.3
Indoleacrylic acid	N/A	N/A	N/A	N/A	N/A	N/A
Kynurenic acid	N/A	N/A	N/A	N/A	N/A	N/A
citrate-isocitrate	N/A	17464.9	N/A	N/A	10111.9	N/A
isocitrate	N/A	N/A	N/A	N/A	N/A	N/A
citrate	N/A	N/A	4457.09	3917.45	8832.93	10765.8
2-dehydro-D-gluconate	N/A	N/A	N/A	N/A	N/A	N/A
D-gluconate	N/A	N/A	N/A	N/A	N/A	N/A
D-erythrose-4-phosphate	N/A	N/A	N/A	N/A	N/A	N/A
Xanthurenic acid	N/A	N/A	N/A	N/A	N/A	N/A
lipoate	N/A	N/A	N/A	N/A	N/A	N/A
D-glucarate	N/A	N/A	N/A	N/A	N/A	N/A
deoxyribose-phosphate	N/A	N/A	N/A	N/A	3735.59	N/A
pantothenate	N/A	N/A	N/A	N/A	N/A	N/A
prephenate	N/A	N/A	N/A	N/A	N/A	N/A
deoxyuridine	N/A	N/A	N/A	N/A	N/A	N/A
ribose-phosphate	N/A	N/A	8049.09	N/A	N/A	N/A
thymidine	N/A	N/A	N/A	N/A	N/A	N/A
uridine	N/A	27520.4	27157	N/A	56098.8	16371.1
deoxyinosine	N/A	N/A	N/A	N/A	N/A	N/A
shikimate-3-phosphate	35318.5	50494.1	21657.3	50582.6	31301.8	14332
D-glucono-?-lactone-6-phosphate	N/A	N/A	N/A	N/A	N/A	N/A
hexose-phosphate	N/A	11276.6	16220.5	N/A	9703.2	7294.35
glucose-1-phosphate	16495.3	13945	N/A	N/A	N/A	N/A
glucose-6-phosphate	N/A	N/A	N/A	N/A	N/A	N/A
fructose-6-phosphate	N/A	N/A	N/A	N/A	N/A	N/A
1,3-diphopshateglycerate	N/A	N/A	N/A	N/A	N/A	N/A
2,3-Diphosphoglyceric acid	N/A	N/A	N/A	N/A	N/A	N/A
S-ribosyl-L-homocysteine-nega	5471.38	26064	12014.5	N/A	N/A	3887.84
inosine	291184	710357	984727	11909	543604	1.40765e+06
6-phospho-D-gluconate	N/A	N/A	N/A	N/A	N/A	N/A
xanthosine	9445.31	14002	6399.63	N/A	11197.5	12022.3
D-sedoheptulose-1-7-phosphate	N/A	N/A	3195.8	N/A	N/A	N/A
N-acetyl-glucosamine-1-phosphate	N/A	N/A	N/A	N/A	5469.96	N/A
glutathione-nega	N/A	5349.86	4000.57	N/A	19899.6	N/A
dUMP-nega	N/A	N/A	N/A	N/A	N/A	N/A
Geranyl-PP	N/A	N/A	N/A	N/A	N/A	N/A
O8P-O1P	N/A	N/A	N/A	N/A	N/A	N/A
dTMP-nega	N/A	N/A	N/A	N/A	N/A	N/A
cyclic-AMP	N/A	N/A	N/A	4680.11	N/A	N/A
fructose-1,6-bisphosphate	N/A	N/A	N/A	N/A	N/A	N/A
trehalose-sucrose	33737.2	112146	25077.9	11701.2	230593	123689
Cellobiose	N/A	N/A	N/A	N/A	N/A	N/A
orotidine-5-phosphate	7021.34	N/A	9614.98	15897.4	N/A	14385.2
SBP	N/A	N/A	N/A	N/A	N/A	N/A
trans, trans-farnesyl diphosphate	N/A	N/A	N/A	N/A	N/A	N/A
S-adenosyl-L-homocysteine-nega	3958.99	9532.88	25293.1	N/A	5458.84	13071.4
dCDP-nega	N/A	N/A	N/A	N/A	N/A	N/A
5-phosphoribosyl-1-pyrophosphate	N/A	N/A	N/A	N/A	N/A	N/A
Deoxycholic acid	N/A	N/A	N/A	N/A	N/A	N/A
OBP	N/A	N/A	N/A	N/A	N/A	N/A
dTDP-nega	N/A	N/A	N/A	N/A	N/A	N/A
CDP-nega	N/A	8553.5	6673.3	9638.7	8600.38	N/A
UDP-nega	N/A	N/A	N/A	N/A	N/A	N/A
Cholic acid	N/A	N/A	N/A	2038.3	N/A	N/A
trehalose-6-Phosphate	N/A	N/A	N/A	N/A	N/A	N/A
Thiamine pyrophosphate	N/A	N/A	N/A	N/A	N/A	N/A
adenosine 5-phosphosulfate	N/A	N/A	N/A	N/A	N/A	N/A
ADP-nega	N/A	N/A	N/A	N/A	N/A	N/A
dGDP-nega	N/A	N/A	N/A	N/A	N/A	N/A
IDP-nega	N/A	N/A	N/A	N/A	N/A	N/A
GDP-nega	N/A	N/A	N/A	N/A	N/A	N/A
CDP-ethanolamine	N/A	7212.44	7886.09	N/A	N/A	N/A
FMN	N/A	N/A	N/A	N/A	N/A	N/A
cholesteryl sulfate	387658	811643	1.23492e+06	107892	631725	692059
dCTP-nega	N/A	N/A	N/A	N/A	N/A	N/A
dUTP-nega	N/A	N/A	N/A	N/A	N/A	N/A
dTTP-nega	N/A	N/A	N/A	N/A	N/A	N/A
CTP-nega	N/A	N/A	N/A	N/A	N/A	N/A
UTP-nega	N/A	N/A	N/A	N/A	N/A	N/A
CDP-choline	N/A	26478.1	N/A	14333.3	N/A	N/A
dATP-nega	N/A	N/A	N/A	N/A	N/A	N/A
Taurodeoxycholic acid	N/A	N/A	N/A	N/A	N/A	N/A
ATP-nega	N/A	N/A	N/A	N/A	N/A	N/A
dGTP	N/A	N/A	N/A	N/A	N/A	N/A
GTP-nega	N/A	N/A	N/A	N/A	N/A	N/A
UDP-D-glucose	N/A	19832.5	13283.1	N/A	17822.2	11599.8
UDP-D-glucuronate	N/A	28662.9	20064.7	N/A	16799.9	20429.6
ADP-D-glucose	N/A	N/A	N/A	N/A	N/A	N/A
guanosine 5-diphosphate,3-diphosphate	N/A	N/A	N/A	N/A	N/A	N/A
UDP-N-acetyl-glucosamine	11053.1	32114.6	32625.7	N/A	27922.2	23093.9
glutathione disulfide-nega	33645	191458	204336	14778.6	243248	182778
NAD+_nega	23121.8	32888.7	57959.9	14778.8	10893.2	22231
NADH-nega	N/A	N/A	14443.3	N/A	N/A	4684.6
dephospho-CoA-nega	N/A	N/A	N/A	N/A	N/A	N/A
cyclic bis(3->5) dimeric GMP	N/A	N/A	N/A	N/A	N/A	N/A
NADP+_nega	N/A	N/A	N/A	N/A	N/A	N/A
NADPH-nega	N/A	N/A	N/A	N/A	N/A	N/A
2-hydroxygluterate	N/A	N/A	14781.5	N/A	34458.1	6493.03
2-deoxyglucose-6-phosphate	N/A	N/A	N/A	N/A	N/A	N/A
4-phosphopantothenate	N/A	N/A	N/A	N/A	N/A	N/A
dehydroascorbic acid	N/A	N/A	N/A	N/A	N/A	N/A
3-hydroxybuterate	N/A	N/A	N/A	N/A	N/A	N/A
itaconic acid	N/A	N/A	N/A	N/A	N/A	N/A
lactose	5608.04	32981	N/A	3195.8	36200.7	42134.6
